# Supplementary material for: Development of antidrug antibodies against adalimumab maps to variation within the HLA-DR peptide-binding groove
Source: PubMed Central journal article supplement (PMC9977494; doi:10.1172/jci.insight.156643), 2023-02-22
Supplement: jciinsight-8-156643-s063.pdf [file jciinsight-8-156643-s063.pdf]

## Supplemental Material

### Acknowledgements

Members of the **Biomarkers of Systemic Outcomes in Psoriasis (BSTOP) Study Group** are as follows:

| PI Name                             | Trust                                                          |
|-------------------------------------|----------------------------------------------------------------|
| Aamir Butt                          | North Lincolnshire and Goole NHS Trust                         |
| Ahmed Al-Rusan                      | Hywel Dda Health Board                                         |
| Alexa Shipman                       | Portsmouth Hospital NHS trust                                  |
| Alexandra Bonsall<br>Fiona Meredith | NHS Grampian                                                   |
| Alison Godwin<br>Diane Williamson   | Betsi Cadwala University Health Board                          |
| Alison Layton                       | Harrogate and District NHS Foundation Trust                    |
| Andrew Wright                       | Bradford Teaching Hospitals NHS Foundation Trust               |
| Anthony Bewley                      | Whipps Cross University Hospital NHS Trust                     |
| Aruni Ranasinghe                    | West Suffolk NHS Foundation Trust                              |
| Bernadette DeSilva                  | Luton & Dunstable University Hospital NHS Foundation Trust     |
| Calum Lyon                          | York teaching Hospital NHS Foundation Trust                    |
| Caoimhe Fahy<br>Chris Lovell        | Royal United Hospitals Bath NHS Foundation Trust               |
| Caroline Angit                      | United Lincolnshire Hospitals NHS Trust                        |
| Caroline Owen                       | East Lancashire Hospitals NHS Trust                            |
| Charles Archer<br>Caroline Higgins  | Royal Berkshire NHS Foundation Trust                           |
| Claudia DeGiovanni                  | Brighton and Sussex University Hospitals NHS Trust             |
| Emily Davies                        | Gloucestershire Hospitals NHS Foundation Trust                 |
| Eva Domanne                         | Countess of Chester Hospital NHS Foundation Trust              |
| Fiona Antony                        | Frimley Park Hospital NHS Foundation Trust                     |
| Fiona Hammonds                      | Royal Cornwall Hospitals NHS Trust                             |
| Gay Perera                          | Westminster Hospital NHS Foundation Trust                      |
| Helen Lewis                         | University Hospitals Birmingham NHS Foundation Trust           |
| Helen Ramsay                        | Sheffield Teaching Hospitals NHS Foundation Trust              |
| Ingrid Salvary                      | James Paget University Hospitals NHS Foundation Trust          |
| Jon Goulding                        | Heart of England NHS Foundation Trust                          |
| Kathy Sands                         | East Kent Hospitals University NHS foundation Trust            |
| Kathy Taghipour                     | The Whittington Hospitals NHS Foundation Trust                 |
| Katya Burova                        | Bedford Hospital NHS Foundation Trust                          |
| Kavitha Sundararaj<br>Anna Chapman  | South London Healthcare NHS Trust                              |
| Kay Baxter                          | Barnsley Hospital NHS Foundation Trust                         |
| Kevin McKenna                       | Belfast Health and Social Care Trust                           |
| Leila Ferguson<br>Ruth Lamb         | St George's University Hospitals NHS Foundation Trust          |
| Mahmud Ali                          | Western Sussex Hospitals NHS Foundation Trust                  |
| Manju Kalavala                      | Cardiff and Vale University Health Board                       |
| Maria-Angeliki Gkini                | Whipps Cross University Hospital NHS Trust                     |
| Martin Wade                         | Barking, Havering and Redbridge University Hospitals NHS Trust |

|                                    |                                                                                                        |
|------------------------------------|--------------------------------------------------------------------------------------------------------|
| Michelle Thomson<br>Raakhee Ramesh | Sandwell & West Birmingham Hospitals NHS Trust                                                         |
| Mihaela Costache                   | South Devon Healthcare NHS Foundation Trust                                                            |
| Mohsen Khorshid                    | Basildon and Thurrock University Hospitals NHS Foundation Trust                                        |
| Nabil Ponnambath                   | Aneurin Bevan Health Board                                                                             |
| Nadia Aldoori                      | Mid Yorkshire Hospitals NHS Trust                                                                      |
| Nick Levell                        | Norfolk and Norwich University Hospitals NHS Foundation Trust                                          |
| Paul Norris<br>Shaheen Haque       | Cambridge University Hospitals NHS Foundation Trust                                                    |
| Periasamy Balasubramaniam          | Betsi Cadwala University Health Board                                                                  |
| Rachel Wachsmuth                   | Yeovil District Hospital NHS Foundation Trust                                                          |
| Rada Rotarescu                     | University Hospital of North Midlands NHS Trust                                                        |
| Rebecca Rose                       | Mid Yorkshire Hospitals NHS Trust                                                                      |
| Richard Parslew                    | Liverpool University Hospitals NHS Foundation Trust                                                    |
| Roberto Verdolini                  | Princess Alexan a Hospitals NHS Trust                                                                  |
| Ruth Murphy                        | Nottingham University Hospitals NHS Trust                                                              |
| Sally McCormack                    | NHS Fife                                                                                               |
| Sandeep Cliff                      | Surrey and Sussex Healthcare Trust                                                                     |
| Sandy McBride                      | Royal Free London NHS Foundation Trust                                                                 |
| Sarah Walsh                        | King's College Hospital NHS Foundation Trust                                                           |
| Serap Mellor                       | Salisbury NHS Foundation Trust                                                                         |
| Sharmela Darne                     | South Tees Hospitals NHS Foundation Trust and North Tees and Hartlepool Hospitals NHS Foundation Trust |
| Shernaz Walton                     | Hull and East Yorkshire Hospitals NHS Trust                                                            |
| Shyamal Wahie                      | County Durham and Darlington NHS Foundation Trust                                                      |
| Simina Stefanescu                  | Queen Elizabeth Hospital King's Lynn NHS Foundation Trust                                              |
| Suzanna August                     | University Hospitals Dorset NHS Foundation Trust                                                       |
| Tapati Sinha                       | Southport and Ormskirk Hospital NHS Trust                                                              |
| Teresa Joseph                      | Sherwood Forest Hospitals NHS Foundation Trust                                                         |
| Trupti Desai                       | Doncaster and Bassetlaw Hospitals NHS Foundation Trust                                                 |
| Urvi Popli                         | Betsi Cadwala University Health Board                                                                  |
| Victoria Brown                     | West Hertfordshire Hospitals NHS Trust                                                                 |
| Victoria Diba<br>James Powell      | Wye Valley NHS Trust                                                                                   |
| Areti Makrygeorgou                 | NHS Greater Glasgow and Clyde                                                                          |
| Harvey Dymond                      | Weston Area Health NHS Trust                                                                           |
| Joanne Topliffe                    | Mid Essex Hospital Services NHS Trust                                                                  |
| Louise Wilcox                      | Burton Hospitals NHS Foundation Trust                                                                  |
| Mel Caswell                        | Blackpool Teaching Hospitals NHS Foundation Trust                                                      |
| Michelle Taylor                    | The Dudley Group NHS Foundation Trust                                                                  |
| Sarah Johnson                      | Mid Staffordshire NHS Foundation Trust and Royal Wolverhampton NHS Trust                               |
| Nicole Lawson                      | Mid Cheshire Hospitals NHS Foundation Trust                                                            |

|                             |                                                    |
|-----------------------------|----------------------------------------------------|
| Alex Anstey                 | Betsi Cadwala University Health Board              |
| Catherine Smith             | Guy's and St. Thomas' NHS Foundation Trust         |
| Nick Reynolds               | Newcastle Upon Tyne Hospitals NHS Foundation Trust |
| Richard Warren              | Salford Royal NHS Foundation Trust                 |
| Saskia Reeken               | Kingston NHS Foundation Trust                      |
| Sue Hood                    | The Ipswich Hospital NHS Trust                     |
| Tara Lees<br>Susanne Farwer | Rotherham NHS Foundation Trust                     |

Members of the **British Association of Dermatologists Biologic and Immunomodulators Register (BADBIR) Study Group** include Jonathan Barker, Marilyn Benham, David Burden, Ian Evans, Christopher Griffiths, Sagair Hussain, Brian Kirby, Linda Lawson, Kayleigh Mason, PhD, Kathleen McElhone, Ruth Murphy, Anthony Ormerod, Caroline Owen, Nick Reynolds, Catherine Smith, and Richard Warren.

Members of the **Psoriasis Stratification to Optimise Relevant Therapy (PSORT) Consortium** include Jonathan Barker, Michael R. Barnes, A. David Burden, Paola di Meglio, Richard Emsley, An ea Evans, Christopher E.M. Griffiths, Katherine Payne, Nick J. Reynolds, Catherine Smith, Deborah Stocken, and Richard B. Warren.

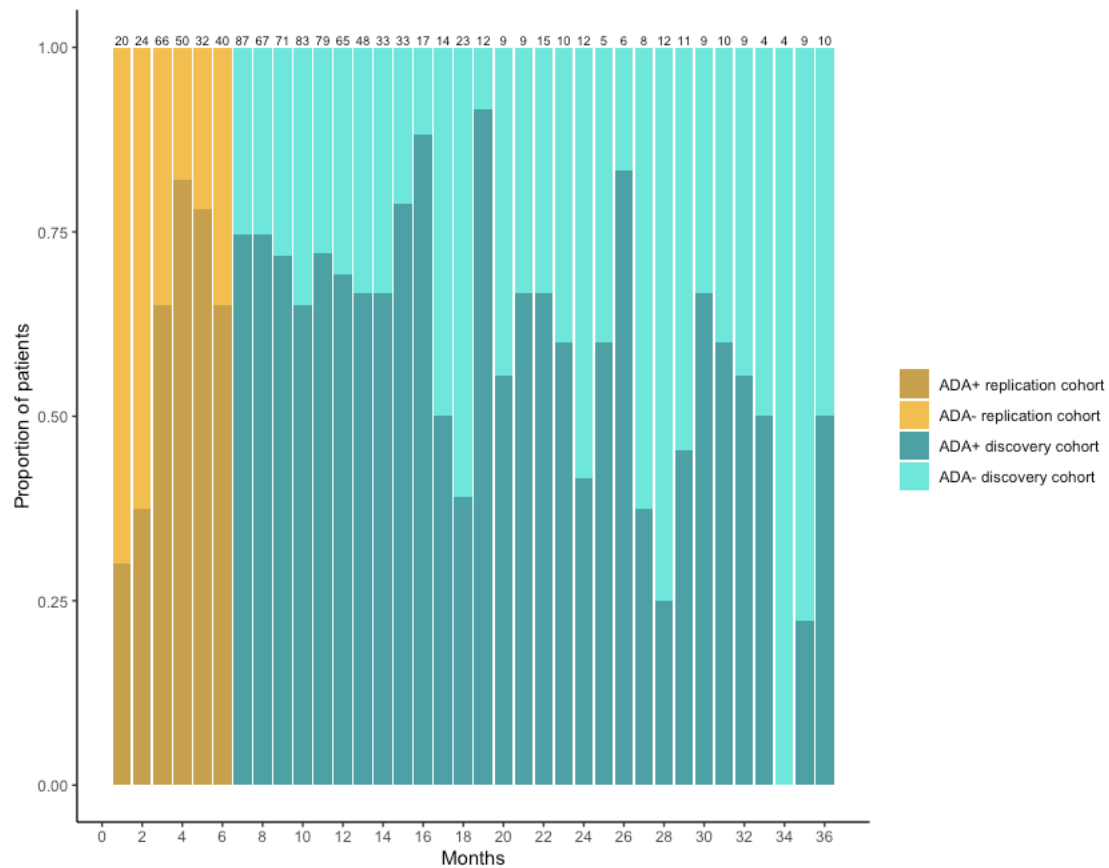

**Figure E1.** ADA prevalence over time. Proportion of patients that are ADA+ (dark coloured bars); ADA- (light coloured bars) by month after treatment initiation. Yellow denotes the replication cohort (individuals sampled within 6 months of treatment initiation, n=232). Turquoise denotes the discovery cohort (individuals sampled 6-36 months after treatment initiation, n=784).

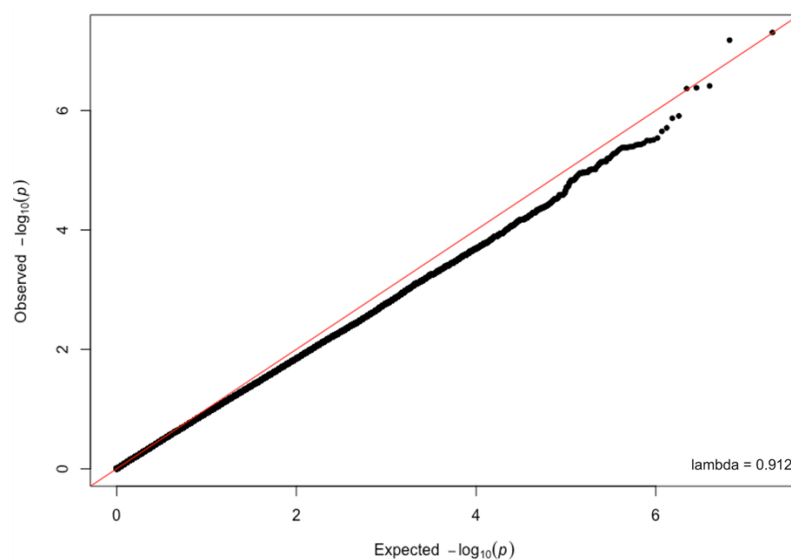

**Figure E2.** Quantile-quantile plot of ADA association p values (discovery cohort: individuals sampled 6-36 months after treatment initiation, n=784).

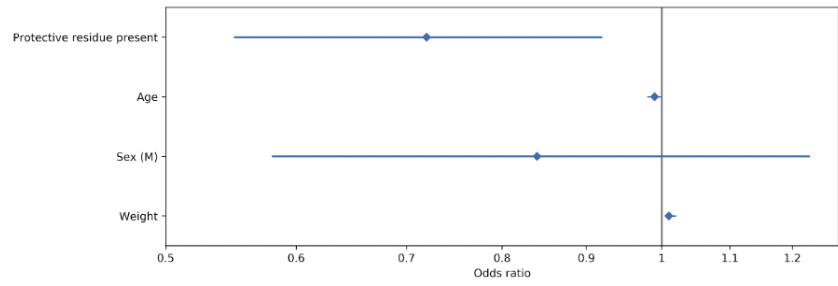

**Figure E3.** Effect sizes for each covariate in Cox regression model for termination of adalimumab due to ineffectiveness (adalimumab treatment duration cohort: individuals with clinical data but no ADA status available, n=716).

**Table E1.** Baseline characteristics of 784 individuals sampled 6-36 months after starting first course of adalimumab (discovery cohort). ADA+: detectable ADA, ADA-: undetectable ADA.

|                                          | All             | ADA+            | ADA-            | Missing data |
|------------------------------------------|-----------------|-----------------|-----------------|--------------|
| Number                                   | 784             | 521 (66%)       | 263 (34%)       | -            |
| Age (yrs),<br>mean $\pm$ SD              | 45.1 $\pm$ 12.2 | 45.2 $\pm$ 12.0 | 44.8 $\pm$ 12.7 | -            |
| Male (%)                                 | 494 (63%)       | 326 (63%)       | 167 (63%)       | -            |
| Weight (kg),<br>mean $\pm$ SD            | 92.6 $\pm$ 22.3 | 94.3 $\pm$ 22.4 | 89.0 $\pm$ 21.7 | -            |
| Biologic naïve, n (%)                    | 583 (74%)       | 392 (75%)       | 191 (73%)       | -            |
| Immunosuppressant<br>co-therapy, n (%)   | 238 (30%)       | 156 (30%)       | 82 (31%)        | -            |
| Psoriatic arthritis, n (%)               | 137 (26%)       | 85/349 (24%)    | 52/171 (30%)    | 264          |
| Baseline PASI,<br>mean $\pm$ SD          | 14.0 $\pm$ 7.3  | 14.3 $\pm$ 7.2  | 13.5 $\pm$ 7.5  | 93           |
| Age at psoriasis onset,<br>mean $\pm$ SD | 22.0 $\pm$ 12.3 | 22.0 $\pm$ 12.3 | 22.0 $\pm$ 12.4 | 166          |
| HLA-C*06:02 carrier<br>status (%)        | 403 (51%)       | 264 (51%)       | 139 (53%)       | -            |

**Table E2.** Baseline characteristics of 232 individuals sampled within 6 months of starting first course of adalimumab (replication cohort). ADA+: detectable ADA, ADA-: undetectable ADA.

|                                     | All             | ADA+            | ADA-            |
|-------------------------------------|-----------------|-----------------|-----------------|
| Number                              | 232             | 150 (65%)       | 82 (35%)        |
| Age (yrs),<br>mean $\pm$ SD         | 43.4 $\pm$ 13.0 | 43.6 $\pm$ 12.8 | 43.0 $\pm$ 13.5 |
| Male (%)                            | 110 (47%)       | 72 (48%)        | 38 (46%)        |
| Weight (kg),<br>mean $\pm$ SD       | 89.5 $\pm$ 22.2 | 91.4 $\pm$ 23.2 | 86.2 $\pm$ 20.2 |
| Biologic naïve (%)                  | 189 (81%)       | 123 (82%)       | 66 (80%)        |
| Immunosuppressant<br>co-therapy (%) | 54 (23%)        | 32 (21%)        | 22 (27%)        |

**Table E3.** Baseline characteristics of 716 individuals with clinical data but no ADA status available, on first course of adalimumab (adalimumab treatment duration cohort). ADA+: detectable ADA, ADA-: undetectable ADA.

|                                     | All             | Terminated adalimumab<br>due to inefficacy | Remainder of cohort |
|-------------------------------------|-----------------|--------------------------------------------|---------------------|
| Number                              | 716             | 145 (20%)                                  | 571 (80%)           |
| Age (yrs),<br>mean $\pm$ SD         | 45.4 $\pm$ 12.6 | 44.7 $\pm$ 12.7                            | 45.6 $\pm$ 12.6     |
| Male (%)                            | 412 (58%)       | 86 (59%)                                   | 326 (57%)           |
| Weight (kg),<br>mean $\pm$ SD       | 90.4 $\pm$ 20.6 | 95.9 $\pm$ 21.4                            | 89.0 $\pm$ 20.2     |
| Biologic naïve (%)                  | 515 (72%)       | 101 (70%)                                  | 414 (73%)           |
| Immunosuppressant<br>co-therapy (%) | 277 (39%)       | 60 (41%)                                   | 217 (38%)           |

**Table E4.** Sensitivity analyses to assess robustness of the HLA-DRB1 joint model to potential confounders (discovery cohort: individuals sampled 6-36 months after treatment initiation, n=784 unless stated otherwise in first column). 9W: presence of tryptophan at position 9. 71K: presence of lysine at position 71.

| Sensitivity analysis                                                          | Model term | OR   | 95% CI    | P value                |
|-------------------------------------------------------------------------------|------------|------|-----------|------------------------|
| Excluding 238/784 individuals on immunosuppressant co-therapy (n=546)         | 9W         | 0.40 | 0.27-0.60 | 3.05x10 <sup>-7</sup>  |
|                                                                               | 71K        | 0.46 | 0.30-0.68 | 1.43x10 <sup>-4</sup>  |
| Increasing the threshold for ADA positivity from 30 AU (detectable) to 100 AU | 9W         | 0.46 | 0.35-0.59 | 1.34x10 <sup>-9</sup>  |
|                                                                               | 71K        | 0.56 | 0.42-0.74 | 6.61x10 <sup>-5</sup>  |
| Including HLA-C*06:02 status as a covariate                                   | 9W         | 0.33 | 0.24-0.45 | 3.17x10 <sup>-12</sup> |
|                                                                               | 71K        | 0.40 | 0.28-0.55 | 6.69x10 <sup>-8</sup>  |
| Including sample timing as a covariate                                        | 9W         | 0.35 | 0.26-0.48 | 2.40x10 <sup>-11</sup> |
|                                                                               | 71K        | 0.41 | 0.29-0.57 | 2.30x10 <sup>-7</sup>  |
| Including psoriatic arthritis status as a covariate (n=520)                   | 9W         | 0.31 | 0.21-0.46 | 4.08x10 <sup>-9</sup>  |
|                                                                               | 71K        | 0.34 | 0.22-0.51 | 5.51x10 <sup>-7</sup>  |
| Including age as a covariate                                                  | 9W         | 0.34 | 0.25-0.45 | 1.94x10 <sup>-12</sup> |
|                                                                               | 71K        | 0.39 | 0.28-0.55 | 5.77x10 <sup>-8</sup>  |
| Including age of psoriasis onset as a covariate (n=618)                       | 9W         | 0.33 | 0.23-0.47 | 1.36x10 <sup>-9</sup>  |
|                                                                               | 71K        | 0.36 | 0.24-0.52 | 1.56x10 <sup>-7</sup>  |
| Including gender as a covariate                                               | 9W         | 0.34 | 0.25-0.45 | 1.87x10 <sup>-12</sup> |
|                                                                               | 71K        | 0.39 | 0.28-0.45 | 6.21x10 <sup>-8</sup>  |
| Including baseline PASI as a covariate (n=691)                                | 9W         | 0.33 | 0.24-0.45 | 3.17x10 <sup>-11</sup> |
|                                                                               | 71K        | 0.38 | 0.26-0.55 | 3.19x10 <sup>-7</sup>  |
| Including all covariates (n=441)                                              | 9W         | 0.29 | 0.18-0.45 | 1.19x10 <sup>-7</sup>  |
|                                                                               | 71K        | 0.32 | 0.19-0.51 | 3.88x10 <sup>-6</sup>  |



**Table E5.** Summary results for marginal association tests of ADA development for each imputed HLA amino acid (discovery cohort: individuals sampled 6-36 months after treatment initiation, n=784).

| SNP                     | A1 | A2 | FRQ    | INFO   | OR     | SE     | P         |
|-------------------------|----|----|--------|--------|--------|--------|-----------|
| AA_DRB1_9_32660121_W    | P  | A  | 0.4879 | 1.0632 | 0.5739 | 0.1085 | 3.09E-07  |
| AA_DRB1_11_32660115_SVD | P  | A  | 0.5121 | 1.0632 | 1.7426 | 0.1085 | 3.09E-07  |
| AA_DRB1_9_32660121_E    | P  | A  | 0.5013 | 1.0408 | 1.7392 | 0.1099 | 4.73E-07  |
| AA_DRB1_11_32660115_SV  | P  | A  | 0.5013 | 1.0408 | 1.7392 | 0.1099 | 4.73E-07  |
| AA_DRB1_140_32657458_A  | P  | A  | 0.4987 | 1.0408 | 0.575  | 0.1099 | 4.73E-07  |
| AA_DRB1_13_32660109_SHG | P  | A  | 0.4924 | 1.0304 | 1.7394 | 0.1107 | 5.69E-07  |
| AA_DRB1_140_32657458_T  | P  | A  | 0.5005 | 1.0394 | 1.7324 | 0.1099 | 5.76E-07  |
| AA_DRB1_11_32660115_SD  | P  | A  | 0.3208 | 0.9959 | 1.8013 | 0.1239 | 2.04E-06  |
| AA_DRB1_-16_32665457_A  | P  | A  | 0.6811 | 0.9838 | 0.5563 | 0.1246 | 2.54E-06  |
| AA_DRB1_-25_32665484_K  | P  | A  | 0.6811 | 0.9838 | 0.5563 | 0.1246 | 2.54E-06  |
| AA_DRB1_10_32660118_Q   | P  | A  | 0.6811 | 0.984  | 0.5565 | 0.1246 | 2.57E-06  |
| AA_DRB1_149_32657431_Q  | P  | A  | 0.69   | 0.9855 | 0.556  | 0.1257 | 3.02E-06  |
| AA_DRB1_13_32660109_SG  | P  | A  | 0.31   | 0.9861 | 1.7971 | 0.1257 | 3.10E-06  |
| AA_DRB1_10_32660118_Y   | P  | A  | 0.31   | 0.9861 | 1.7971 | 0.1257 | 3.10E-06  |
| AA_DRB1_11_32660115_S   | P  | A  | 0.31   | 0.9861 | 1.7971 | 0.1257 | 3.10E-06  |
| AA_DRB1_12_32660112_T   | P  | A  | 0.31   | 0.9861 | 1.7971 | 0.1257 | 3.10E-06  |
| AA_DRB1_149_32657431_H  | P  | A  | 0.3092 | 0.986  | 1.7886 | 0.1257 | 3.74E-06  |
| AA_DRB1_-16_32665457_V  | P  | A  | 0.2975 | 0.9878 | 1.8037 | 0.1276 | 3.77E-06  |
| AA_DRB1_-25_32665484_R  | P  | A  | 0.2975 | 0.9878 | 1.8037 | 0.1276 | 3.77E-06  |
| AA_DRB1_233_32656004_T  | P  | A  | 0.6923 | 0.9765 | 0.563  | 0.1262 | 5.35E-06  |
| AA_DRB1_37_32660037_SF  | P  | A  | 0.5181 | 1.0645 | 0.617  | 0.1079 | 7.69E-06  |
| AA_DRB1_233_32656004_R  | P  | A  | 0.2863 | 0.9854 | 1.7788 | 0.1292 | 8.25E-06  |
| AA_DRB1_13_32660109_SH  | P  | A  | 0.4653 | 1.0321 | 1.6295 | 0.1104 | 9.76E-06  |
| AA_DRB1_11_32660115_GL  | P  | A  | 0.3667 | 1.0031 | 0.6081 | 0.1127 | 1.02E-05  |
| AA_DRB1_30_32660058_LC  | P  | A  | 0.3667 | 1.0031 | 0.6081 | 0.1127 | 1.02E-05  |
| AA_DRB1_37_32660037_NY  | P  | A  | 0.4721 | 1.0545 | 1.6136 | 0.1086 | 1.06E-05  |
| AA_DRB1_30_32660058_YHG | P  | A  | 0.6244 | 0.9911 | 1.6353 | 0.113  | 1.36E-05  |
| AA_DRB1_30_32660058_YGR | P  | A  | 0.6235 | 0.994  | 1.6251 | 0.1127 | 1.65E-05  |
| AA_DRB1_30_32660058_YHR | P  | A  | 0.6224 | 0.9905 | 1.6203 | 0.1129 | 1.93E-05  |
| AA_DRB1_11_32660115_SPV | P  | A  | 0.6224 | 0.9905 | 1.6203 | 0.1129 | 1.93E-05  |
| AA_DRB1_30_32660058_YG  | P  | A  | 0.6146 | 0.9815 | 1.6168 | 0.1131 | 2.15E-05  |
| AA_DRB1_13_32660109_YF  | P  | A  | 0.3865 | 0.9779 | 0.6201 | 0.1134 | 2.49E-05  |
| AA_DRB1_30_32660058_YH  | P  | A  | 0.6135 | 0.9779 | 1.6126 | 0.1134 | 2.49E-05  |
| AA_DRB1_30_32660058_YR  | P  | A  | 0.6127 | 0.9807 | 1.6027 | 0.113  | 3.01E-05  |
| AA_DRB1_13_32660109_S   | P  | A  | 0.2829 | 0.9639 | 1.719  | 0.1299 | 3.04E-05  |
| AA_DRB1_28_32660064_E   | P  | A  | 0.3871 | 0.9824 | 0.6259 | 0.1129 | 3.30E-05  |
| AA_DRB1_30_32660058_Y   | P  | A  | 0.6038 | 0.9676 | 1.5957 | 0.1135 | 3.84E-05  |
| AA_DRB1_28_32660064_D   | P  | A  | 0.6021 | 0.9684 | 1.5771 | 0.1133 | 5.81E-05  |
| AA_DRB1_67_32659947_F   | P  | A  | 0.0772 | 0.9848 | 2.4524 | 0.249  | 0.0003147 |
| AA_DRB1_13_32660109_SRH | P  | A  | 0.5865 | 0.9966 | 1.4761 | 0.1106 | 0.0004313 |
| AA_DRB1_11_32660115_SPD | P  | A  | 0.442  | 0.9733 | 1.4805 | 0.1124 | 0.0004795 |

|                         |   |   |        |        |        |        |           |
|-------------------------|---|---|--------|--------|--------|--------|-----------|
| AA_DRB1_11_32660115_PG  | P | A | 0.4062 | 1.0613 | 0.6882 | 0.1071 | 0.0004857 |
| AA_DRB1_13_32660109_RY  | P | A | 0.4062 | 1.0613 | 0.6882 | 0.1071 | 0.0004857 |
| AA_DRB1_58_32659974_E   | P | A | 0.0462 | 1.0051 | 3.3819 | 0.355  | 0.0005977 |
| AA_DRB1_58_32659974_A   | P | A | 0.9538 | 1.0055 | 0.296  | 0.3548 | 0.0006014 |
| AA_DRB1_-17_32665460_T  | P | A | 0.2028 | 1.0691 | 0.6497 | 0.1273 | 0.0007076 |
| AA_DRB1_11_32660115_PL  | P | A | 0.2028 | 1.0691 | 0.6497 | 0.1273 | 0.0007076 |
| AA_DRB1_37_32660037_S   | P | A | 0.2029 | 1.0685 | 0.6498 | 0.1273 | 0.0007104 |
| AA_DRB1_11_32660115_SVL | P | A | 0.5829 | 1.0399 | 1.4391 | 0.108  | 0.0007479 |
| AA_DRB1_13_32660109_SRG | P | A | 0.4311 | 0.9754 | 1.4583 | 0.1125 | 0.0007969 |
| AA_DRB1_11_32660115_SP  | P | A | 0.4311 | 0.9754 | 1.4583 | 0.1125 | 0.0007971 |
| AA_DRB1_96_32657590_QE  | P | A | 0.2117 | 1.0752 | 0.6663 | 0.125  | 0.001163  |
| AA_DRB1_37_32660037_SL  | P | A | 0.2127 | 1.0625 | 0.6664 | 0.1258 | 0.001257  |
| AA_DRB1_96_32657590_HY  | P | A | 0.7877 | 1.0733 | 1.4942 | 0.125  | 0.001318  |
| AA_DRB1_11_32660115_SVG | P | A | 0.7863 | 1.0471 | 1.4984 | 0.1266 | 0.001404  |
| AA_DRB1_11_32660115_L   | P | A | 0.0816 | 1.0642 | 0.5627 | 0.1835 | 0.001732  |
| AA_DRB1_30_32660058_C   | P | A | 0.0816 | 1.0642 | 0.5627 | 0.1835 | 0.001732  |
| AA_DRB1_96_32657590_E   | P | A | 0.0816 | 1.0642 | 0.5627 | 0.1835 | 0.001732  |
| AA_DRB1_-17_32665460_A  | P | A | 0.7758 | 1.0428 | 1.4782 | 0.1248 | 0.001736  |
| AA_DRB1_32_32660052_H   | P | A | 0.2508 | 0.9676 | 1.5163 | 0.133  | 0.001745  |
| AA_DRB1_96_32657590_Ex  | P | A | 0.0822 | 1.0615 | 0.5694 | 0.1832 | 0.002107  |
| AA_DRB1_13_32660109_RF  | P | A | 0.2226 | 1.0527 | 0.6829 | 0.1245 | 0.00219   |
| AA_DRB1_37_32660037_YL  | P | A | 0.2691 | 0.9885 | 1.4708 | 0.1276 | 0.002504  |
| AA_DRB1_74_32659926_LE  | P | A | 0.0706 | 0.9328 | 2.1108 | 0.2509 | 0.0029    |
| AA_DRB1_37_32660037_Y   | P | A | 0.2593 | 0.9812 | 1.4664 | 0.1295 | 0.003122  |
| AA_DRB1_30_32660058_CR  | P | A | 0.0906 | 1.0707 | 0.6049 | 0.1747 | 0.004012  |
| AA_DQB1_130_32737898_Q  | P | A | 0.0226 | 1.0263 | 8.4443 | 0.7431 | 0.004089  |
| AA_DQB1_86_32740579_G   | P | A | 0.0226 | 1.0265 | 8.4385 | 0.7431 | 0.004104  |
| AA_DRB1_13_32660109_SHF | P | A | 0.5667 | 1.0696 | 1.3516 | 0.1056 | 0.004334  |
| AA_DQB1_130_32737898_R  | P | A | 0.9762 | 1.0236 | 0.1751 | 0.6131 | 0.004482  |
| AA_DQB1_86_32740579_EA  | P | A | 0.9762 | 1.0237 | 0.1751 | 0.6131 | 0.004491  |
| AA_DRB1_71_32659935_E   | P | A | 0.0946 | 0.9518 | 1.8178 | 0.2106 | 0.004537  |
| AA_DQA1_47_32717191_K   | P | A | 0.2844 | 0.9793 | 0.715  | 0.1197 | 0.005053  |
| AA_DQA1_52_32717206_H   | P | A | 0.2844 | 0.9793 | 0.715  | 0.1197 | 0.005053  |
| AA_DQA1_54_32717212_L   | P | A | 0.2844 | 0.9793 | 0.715  | 0.1197 | 0.005053  |
| AA_DRB1_30_32660058_CH  | P | A | 0.0906 | 1.0619 | 0.6112 | 0.1758 | 0.005089  |
| AA_DRB1_11_32660115_G   | P | A | 0.2851 | 0.983  | 0.7162 | 0.1194 | 0.005158  |
| AA_DRB1_13_32660109_Y   | P | A | 0.2851 | 0.983  | 0.7162 | 0.1194 | 0.005158  |
| AA_DRB1_14_32660106_K   | P | A | 0.2851 | 0.983  | 0.7162 | 0.1194 | 0.005158  |
| AA_DRB1_25_32660073_Q   | P | A | 0.2851 | 0.983  | 0.7162 | 0.1194 | 0.005158  |
| AA_DRB1_30_32660058_L   | P | A | 0.2851 | 0.983  | 0.7162 | 0.1194 | 0.005158  |
| AA_DRB1_74_32659926_Q   | P | A | 0.2851 | 0.983  | 0.7162 | 0.1194 | 0.005159  |
| AA_DRB1_57_32659977_DV  | P | A | 0.9416 | 0.9829 | 0.4737 | 0.2681 | 0.005328  |
| AA_DRB1_13_32660109_SFG | P | A | 0.4114 | 1.0123 | 1.3627 | 0.1113 | 0.005413  |
| AA_DRB1_13_32660109_SR  | P | A | 0.4041 | 0.9735 | 1.3675 | 0.1133 | 0.005722  |
| AA_DRB1_30_32660058_CG  | P | A | 0.0925 | 1.05   | 0.6165 | 0.1751 | 0.00574   |
| AA_DRB1_31_32660055_I   | P | A | 0.0925 | 1.05   | 0.6165 | 0.1751 | 0.00574   |
| AA_DRB1_11_32660115_LD  | P | A | 0.0925 | 1.05   | 0.6165 | 0.1751 | 0.005742  |

|                         |   |   |        |        |        |        |          |
|-------------------------|---|---|--------|--------|--------|--------|----------|
| AA_DRB1_11_32660115_SLD | P | A | 0.4024 | 1.0107 | 1.3564 | 0.1118 | 0.006402 |
| AA_DRB1_30_32660058_LR  | P | A | 0.294  | 0.9645 | 0.7217 | 0.1197 | 0.006423 |
| AA_DQA1_52_32717206_R   | P | A | 0.4024 | 1.0206 | 1.3527 | 0.1111 | 0.006531 |
| AA_DQA1_47_32717191_RK  | P | A | 0.5976 | 1.0206 | 0.7393 | 0.1111 | 0.006531 |
| AA_DRB1_30_32660058_LH  | P | A | 0.2948 | 0.9745 | 0.7281 | 0.1188 | 0.007551 |
| AA_DRB1_30_32660058_LG  | P | A | 0.2959 | 0.9715 | 0.7315 | 0.119  | 0.00861  |
| AA_DRB1_4_32665400_Q    | P | A | 0.2959 | 0.9715 | 0.7315 | 0.119  | 0.00861  |
| AA_DRB1_11_32660115_GD  | P | A | 0.2959 | 0.9715 | 0.7315 | 0.119  | 0.008612 |
| AA_DRB1_78_32659914_V   | P | A | 0.2959 | 0.9715 | 0.7316 | 0.119  | 0.008615 |
| AA_DRB1_30_32660058_YLG | P | A | 0.8997 | 1.0676 | 1.5469 | 0.1676 | 0.009263 |
| AA_DRB1_26_32660070_L   | P | A | 0.1003 | 1.0678 | 0.6465 | 0.1676 | 0.009268 |
| AA_DRB1_30_32660058_YCG | P | A | 0.6962 | 0.9557 | 1.3634 | 0.1191 | 0.00927  |
| AA_DRB1_11_32660115_SL  | P | A | 0.3916 | 1.0041 | 1.3404 | 0.1126 | 0.009276 |
| AA_DQB1_-17_32742316_A  | P | A | 0.9777 | 1.0182 | 0.2264 | 0.5723 | 0.009455 |
| AA_DRB1_181_32657335_M  | P | A | 0.3048 | 0.9527 | 0.7368 | 0.1194 | 0.01052  |
| AA_DRB1_30_32660058_YCH | P | A | 0.6952 | 0.9527 | 1.3572 | 0.1194 | 0.01052  |
| AA_DRB1_13_32660109_F   | P | A | 0.1014 | 1.0549 | 0.6523 | 0.1681 | 0.01102  |
| AA_DRB1_30_32660058_YLH | P | A | 0.8986 | 1.0549 | 1.533  | 0.1681 | 0.01102  |
| AA_DRB1_31_32660055_F   | P | A | 0.8986 | 1.0549 | 1.533  | 0.1681 | 0.01102  |
| AA_DRB1_37_32660037_NL  | P | A | 0.2226 | 0.9756 | 1.4137 | 0.1372 | 0.01165  |
| AA_DRB1_4_32665400_R    | P | A | 0.7023 | 0.9691 | 1.3495 | 0.119  | 0.01174  |
| AA_DRB1_30_32660058_YCR | P | A | 0.6943 | 0.9625 | 1.3459 | 0.1185 | 0.01221  |
| AA_DRB1_60_32659968_S   | P | A | 0.3057 | 0.9625 | 0.743  | 0.1185 | 0.01222  |
| AA_DRB1_57_32659977_V   | P | A | 0.3057 | 0.9625 | 0.743  | 0.1185 | 0.01223  |
| AA_DQA1_34_32717152_E   | P | A | 0.5944 | 0.9842 | 0.7555 | 0.1124 | 0.01259  |
| AA_DRB1_30_32660058_YLR | P | A | 0.8977 | 1.0484 | 1.5211 | 0.1683 | 0.01271  |
| AA_DRB1_37_32660037_N   | P | A | 0.2128 | 0.9631 | 1.4114 | 0.1403 | 0.01405  |
| AA_DRB1_73_32659929_G   | P | A | 0.4133 | 0.9528 | 0.7591 | 0.1123 | 0.01409  |
| AA_DRB1_74_32659926_RQ  | P | A | 0.4133 | 0.9528 | 0.7591 | 0.1123 | 0.01409  |
| AA_DRB1_74_32659926_E   | P | A | 0.0563 | 0.9272 | 1.9661 | 0.2755 | 0.01413  |
| AA_DRB1_30_32660058_YC  | P | A | 0.6854 | 0.9433 | 1.3367 | 0.119  | 0.01475  |
| AA_DPB1_194_33161555_Q  | P | A | 0.0517 | 1.1277 | 0.5866 | 0.2201 | 0.01538  |
| AA_DRB1_47_32660007_F   | P | A | 0.3693 | 0.9963 | 1.3124 | 0.114  | 0.01711  |
| AA_DRB1_13_32660109_SHY | P | A | 0.7503 | 1.0131 | 1.3268 | 0.1227 | 0.0212   |
| AA_DRB1_30_32660058_YL  | P | A | 0.8888 | 1.0514 | 1.4517 | 0.1623 | 0.02167  |
| AA_DRB1_74_32659926_QL  | P | A | 0.2993 | 1.0225 | 0.7684 | 0.1154 | 0.02239  |
| AA_DQA1_40_32717170_G   | P | A | 0.2085 | 0.9529 | 1.3662 | 0.1404 | 0.02629  |
| AA_DQA1_47_32717191_C   | P | A | 0.2085 | 0.9529 | 1.3662 | 0.1404 | 0.02629  |
| AA_DQA1_50_32717200_V   | P | A | 0.2085 | 0.9529 | 1.3662 | 0.1404 | 0.02629  |
| AA_DQA1_51_32717203_L   | P | A | 0.2085 | 0.9529 | 1.3662 | 0.1404 | 0.02629  |
| AA_DQA1_53_32717209_Q   | P | A | 0.2085 | 0.9529 | 1.3662 | 0.1404 | 0.02629  |
| AA_DRB1_13_32660109_SF  | P | A | 0.3843 | 1.0022 | 1.2815 | 0.1127 | 0.02775  |
| AA_DRB1_67_32659947_I   | P | A | 0.5075 | 1.0309 | 0.7952 | 0.1067 | 0.0318   |
| AA_DRB1_181_32657335_T  | P | A | 0.6838 | 0.9846 | 1.2832 | 0.1162 | 0.03196  |
| AA_DQB1_77_32740606_R   | P | A | 0.3989 | 1.0533 | 0.7975 | 0.1072 | 0.03472  |
| AA_DRB1_71_32659935_KA  | P | A | 0.37   | 1.041  | 0.7967 | 0.109  | 0.03707  |
| AA_DQB1_71_32740624_KA  | P | A | 0.3977 | 1.0522 | 0.8004 | 0.1072 | 0.03787  |

|                         |   |   |        |        |        |        |         |
|-------------------------|---|---|--------|--------|--------|--------|---------|
| AA_DRB1_74_32659926_AQ  | P | A | 0.8012 | 0.9924 | 0.7475 | 0.1406 | 0.03855 |
| AA_DRB1_70_32659938_R   | P | A | 0.0498 | 0.9721 | 1.7723 | 0.279  | 0.04025 |
| AA_DRB1_13_32660109_YG  | P | A | 0.3121 | 1.0132 | 0.7924 | 0.1146 | 0.04228 |
| AA_DPB1_55_33156577_E   | P | A | 0.0321 | 0.9229 | 2.1246 | 0.3727 | 0.0432  |
| AA_DRB1_96_32657590_Hx  | P | A | 0.606  | 0.995  | 1.2499 | 0.1103 | 0.04326 |
| AA_DRB1_11_32660115_SGD | P | A | 0.6059 | 0.9957 | 1.2491 | 0.1103 | 0.04373 |
| AA_DRB1_74_32659926_AE  | P | A | 0.5724 | 0.9823 | 1.2473 | 0.11   | 0.0445  |
| AA_DRB1_37_32660037_F   | P | A | 0.3152 | 0.9713 | 0.792  | 0.1169 | 0.04599 |
| AA_DRB1_96_32657590_H   | P | A | 0.6054 | 0.9953 | 1.2453 | 0.1103 | 0.04673 |
| AA_DRB1_57_32659977_A   | P | A | 0.0301 | 0.9655 | 2.0706 | 0.3678 | 0.04782 |
| AA_DRB1_60_32659968_H   | P | A | 0.0301 | 0.9654 | 2.0705 | 0.3678 | 0.04782 |

---

**Table E6.** Summary results for marginal association tests of ADA development for each classical HLA allele (discovery cohort: individuals sampled 6-36 months after treatment initiation, n=784).

| SNP           | A1 | A2 | FRQ    | INFO   | OR     | SE     | P         |
|---------------|----|----|--------|--------|--------|--------|-----------|
| HLA_DRB1_11   | P  | A  | 0.0462 | 1.0054 | 3.3793 | 0.3548 | 0.0006003 |
| HLA_DRB1_01   | P  | A  | 0.0816 | 1.0642 | 0.5628 | 0.1835 | 0.001733  |
| HLA_DRB1_1302 | P  | A  | 0.0223 | 1.0356 | 8.0544 | 0.7326 | 0.004402  |
| HLA_DQA1_02   | P  | A  | 0.2844 | 0.9793 | 0.715  | 0.1197 | 0.005053  |
| HLA_DQA1_0201 | P  | A  | 0.2844 | 0.9793 | 0.715  | 0.1197 | 0.005053  |
| HLA_DRB1_07   | P  | A  | 0.2851 | 0.983  | 0.7162 | 0.1194 | 0.005159  |
| HLA_DRB1_0701 | P  | A  | 0.2851 | 0.983  | 0.7162 | 0.1194 | 0.005159  |
| HLA_DQB1_0501 | P  | A  | 0.0849 | 1.0867 | 0.6136 | 0.1785 | 0.006207  |
| HLA_DRB1_13   | P  | A  | 0.0798 | 0.9571 | 1.8167 | 0.2276 | 0.008706  |
| HLA_DPB1_01   | P  | A  | 0.0517 | 1.1277 | 0.5865 | 0.2201 | 0.01537   |
| HLA_DPB1_0101 | P  | A  | 0.0517 | 1.1277 | 0.5865 | 0.2201 | 0.01537   |
| HLA_DQB1_0604 | P  | A  | 0.0167 | 1.0537 | 5.7394 | 0.7483 | 0.01954   |
| HLA_DRB1_0101 | P  | A  | 0.0599 | 1.0835 | 0.6245 | 0.2094 | 0.02455   |
| HLA_DRB1_14   | P  | A  | 0.0318 | 0.9487 | 2.2516 | 0.3683 | 0.02754   |
| HLA_DQB1_0302 | P  | A  | 0.0932 | 0.957  | 1.5338 | 0.2026 | 0.03475   |
| HLA_DQB1_0503 | P  | A  | 0.031  | 0.9626 | 2.1587 | 0.3666 | 0.03583   |
| HLA_DRB1_1501 | P  | A  | 0.1091 | 1.113  | 0.7317 | 0.1591 | 0.04953   |

**Table E7.** Classical HLA-DRB1 alleles ordered by associated risk of developing ADA. Corresponding amino acids at positions 9 and 71 are shown (discovery cohort: individuals sampled 6-36 months after treatment initiation, n=784). †denotes classical HLA-DRB1 alleles harbouring protective residues at either position 9 or position 71. W: tryptophan, E: glutamic acid, K: lysine, R: arginine.

|                                 | <b>Freq</b> | <b>OR</b> | <b>SE</b> | <b>P value</b> | <b>Position 9</b> | <b>Position 71</b> |
|---------------------------------|-------------|-----------|-----------|----------------|-------------------|--------------------|
| <b>HLA-DRB1*01</b> <sup>†</sup> | 0.0816      | 0.5628    | 0.1835    | 0.001733       | W                 | R                  |
| <b>HLA-DRB1*07</b> <sup>†</sup> | 0.2851      | 0.7162    | 0.1194    | 0.005159       | W                 | R                  |
| <b>HLA-DRB1*15</b> <sup>†</sup> | 0.1130      | 0.7761    | 0.1582    | 0.109          | W                 | A                  |
| <b>HLA-DRB1*03</b> <sup>†</sup> | 0.1282      | 1.0375    | 0.1652    | 0.8238         | E                 | K                  |
| <b>HLA-DRB1*16</b> <sup>†</sup> | 0.0082      | 1.1128    | 0.6151    | 0.8621         | W                 | R                  |
| <b>HLA-DRB1*04</b> <sup>†</sup> | 0.1824      | 1.1579    | 0.1425    | 0.3035         | E                 | K                  |
| <b>HLA-DRB1*10</b>              | 0.0089      | 1.2430    | 0.6008    | 0.7173         | E                 | R                  |
| <b>HLA-DRB1*12</b>              | 0.0098      | 1.3287    | 0.5746    | 0.6209         | E                 | R                  |
| <b>HLA-DRB1*09</b>              | 0.0108      | 1.5096    | 0.5809    | 0.4784         | K                 | R                  |
| <b>HLA-DRB1*13</b>              | 0.0798      | 1.8167    | 0.2276    | 0.008706       | E                 | E                  |
| <b>HLA-DRB1*14</b>              | 0.0318      | 2.2516    | 0.3683    | 0.02754        | E                 | R                  |
| <b>HLA-DRB1*08</b>              | 0.0142      | 2.5133    | 0.5674    | 0.1043         | E                 | R                  |
| <b>HLA-DRB1*11</b>              | 0.0462      | 3.3793    | 0.3548    | 0.0006003      | E                 | R                  |
